# Supplementary material for: Gene Regulatory Networks Elucidating Huanglongbing Disease Mechanisms
Source: PubMed Central journal article supplement (PMC3783430; doi:10.1371/journal.pone.0074256), 2013-09-25
Supplement: pone.0074256.s002.pdf [file pone.0074256.s002.pdf]

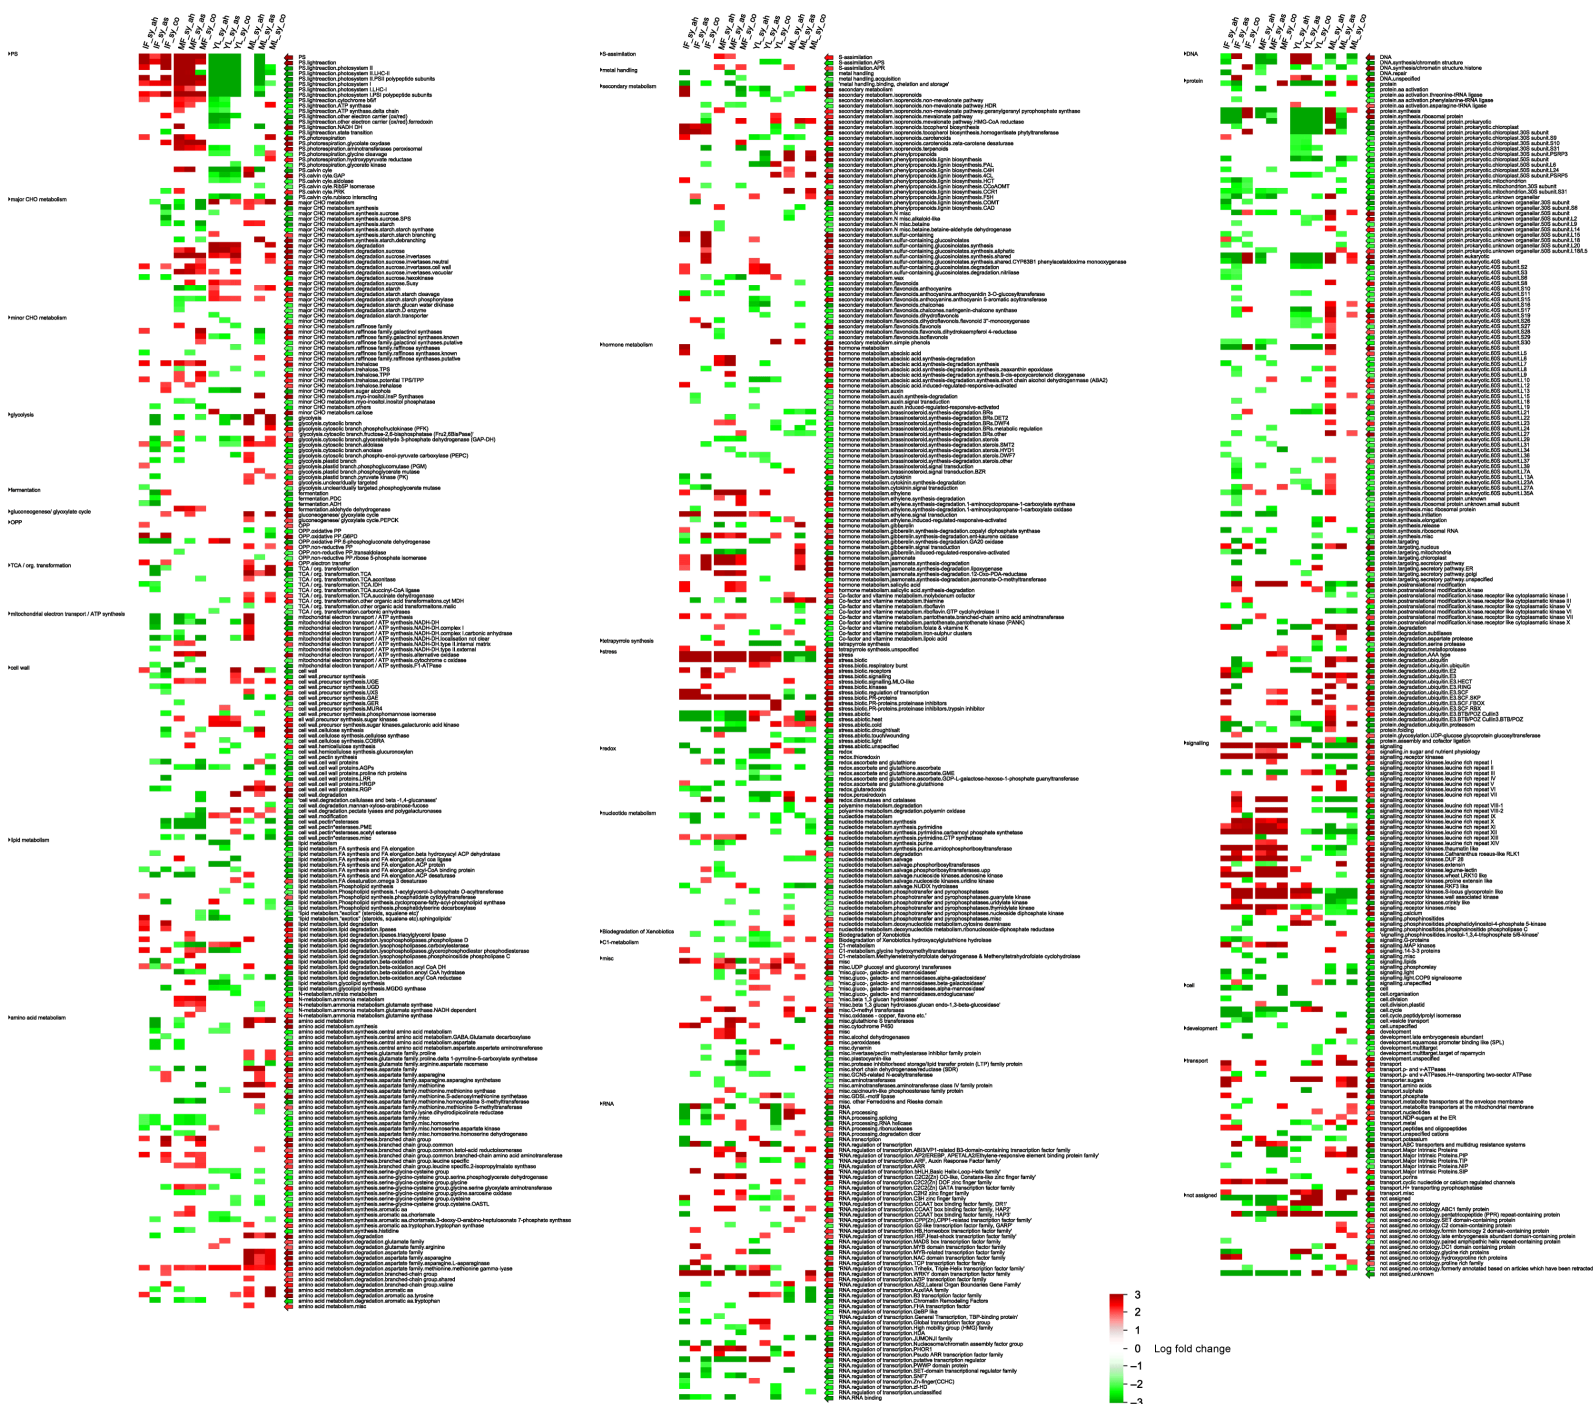

**Figure S2.** PageMan gene set enrichment analysis using Wilcoxon test without multiple testing correction (ora cutoff = 1.0). Use zoom out of PDF viewer to enlarge text and data blocks. Column headings indicate 12 comparisons between disease status of samples for each of four tissue types; see Table 1 for a key to abbreviations.
