# Supplementary material for: Gene Regulatory Networks Elucidating Huanglongbing Disease Mechanisms
Source: PubMed Central journal article supplement (PMC3783430; doi:10.1371/journal.pone.0074256), 2013-09-25
Supplement: pone.0074256.s004.pdf [file pone.0074256.s004.pdf]

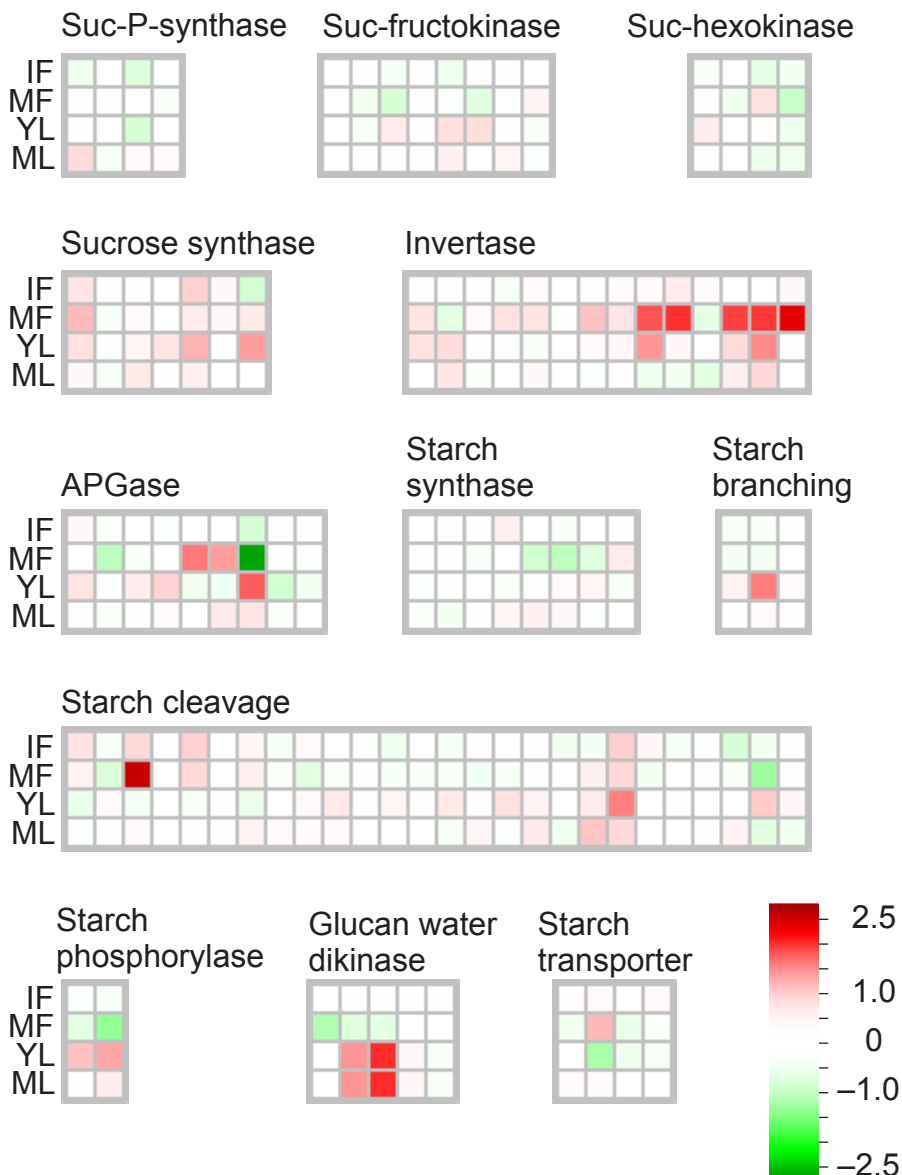

**Figure S4.** Expression changes caused by HLB in transcripts encoding starch and sucrose metabolism, comparing symptomatic to apparently healthy samples. Tissue types are indicated on the left margin of each block of data.
