# Supplementary material for: Gene Regulatory Networks Elucidating Huanglongbing Disease Mechanisms
Source: PubMed Central journal article supplement (PMC3783430; doi:10.1371/journal.pone.0074256), 2013-09-25
Supplement: pone.0074256.s005.pdf [file pone.0074256.s005.pdf]

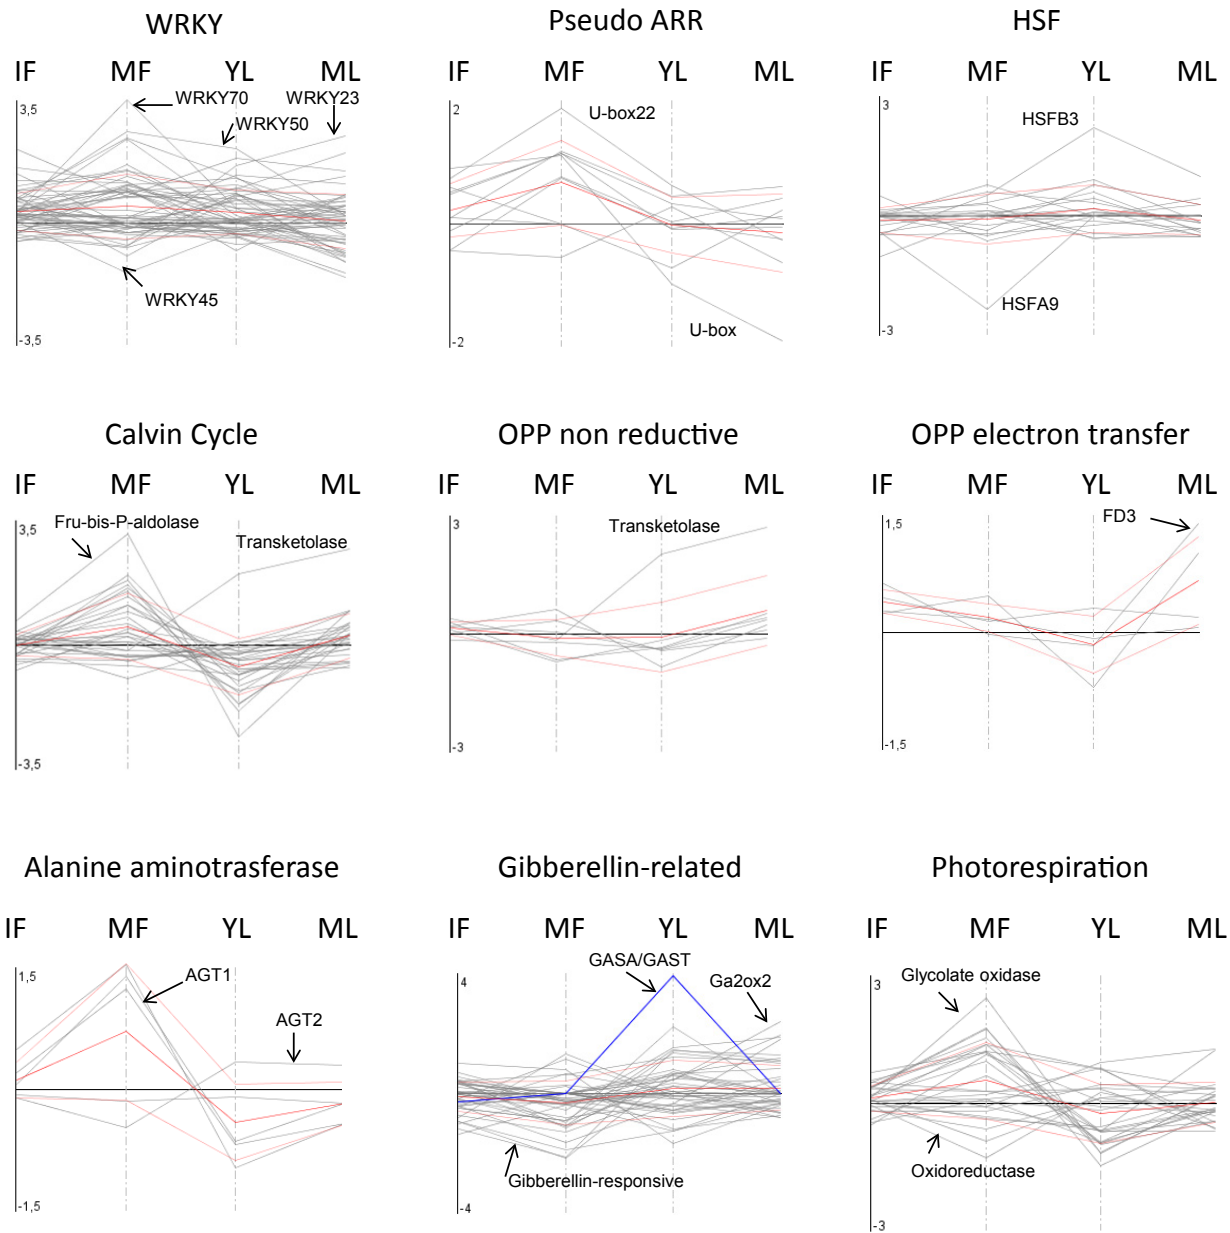

**Figure S5.** Expression changes caused by HLB in a subset of transcripts with opposite expression patterns in the four tissues (see Table 1 for a key to abbreviations). Tissue types are indicated as column headings above each graph.
