# Supplementary material for: Gene Regulatory Networks Elucidating Huanglongbing Disease Mechanisms
Source: PubMed Central journal article supplement (PMC3783430; doi:10.1371/journal.pone.0074256), 2013-09-25
Supplement: pone.0074256.s007.pdf [file pone.0074256.s007.pdf]

## Young Leaves

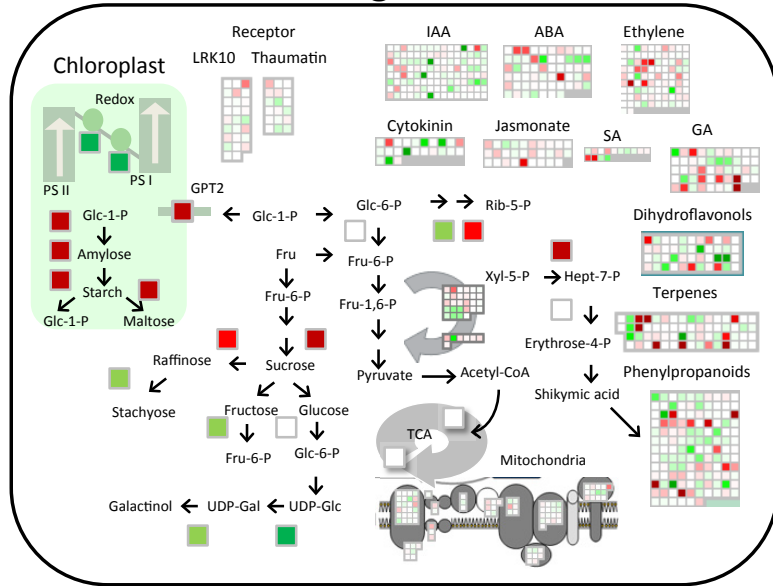

## Mature Leaves

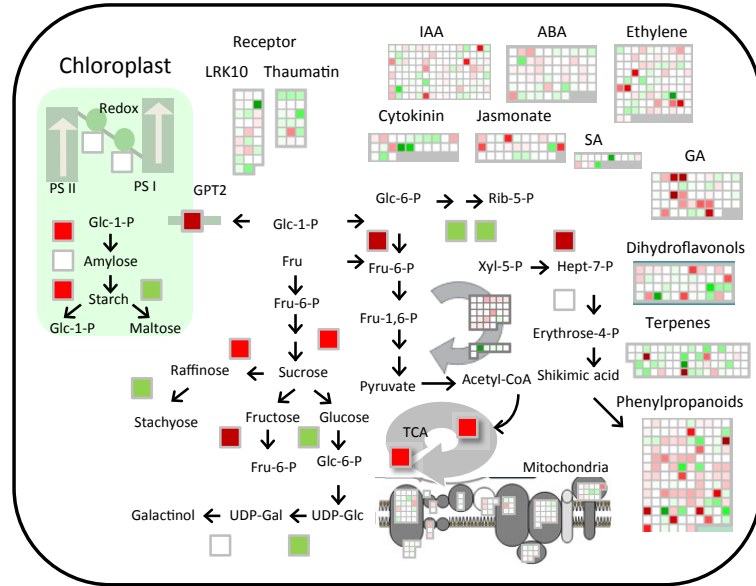

## Immature Fruits

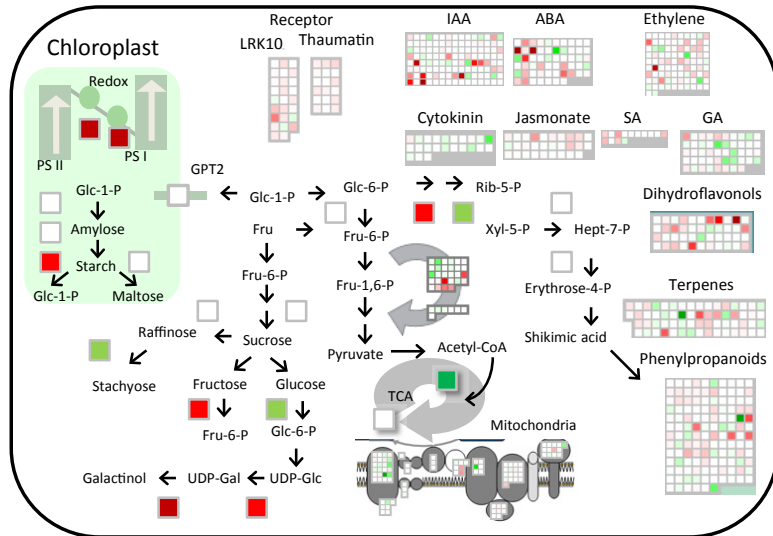

## Mature Fruits

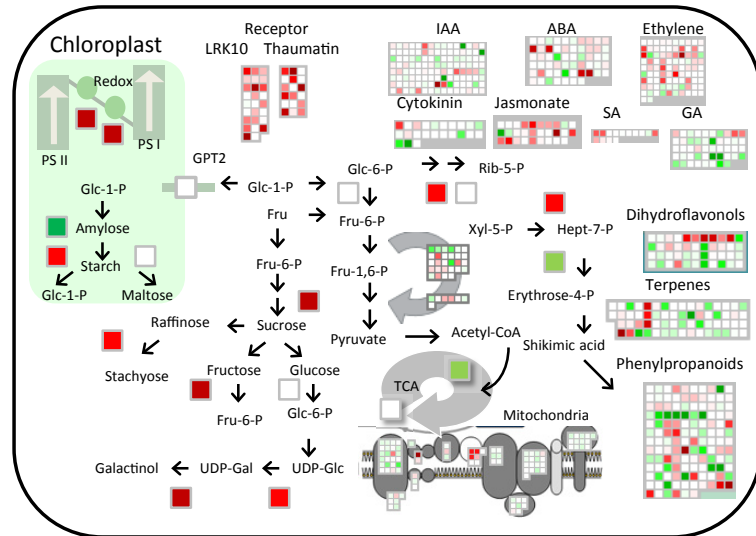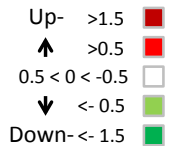

**Figure S7. Overview of principal transcriptional changes induced by HLB (those in Fig. 2 along with those associated with hormone and secondary metabolism) induced by HLB in four tissues.**
