# Supplementary material for: Gene Regulatory Networks Elucidating Huanglongbing Disease Mechanisms
Source: PubMed Central journal article supplement (PMC3783430; doi:10.1371/journal.pone.0074256), 2013-09-25
Supplement: pone.0074256.s008.pdf [file pone.0074256.s008.pdf]

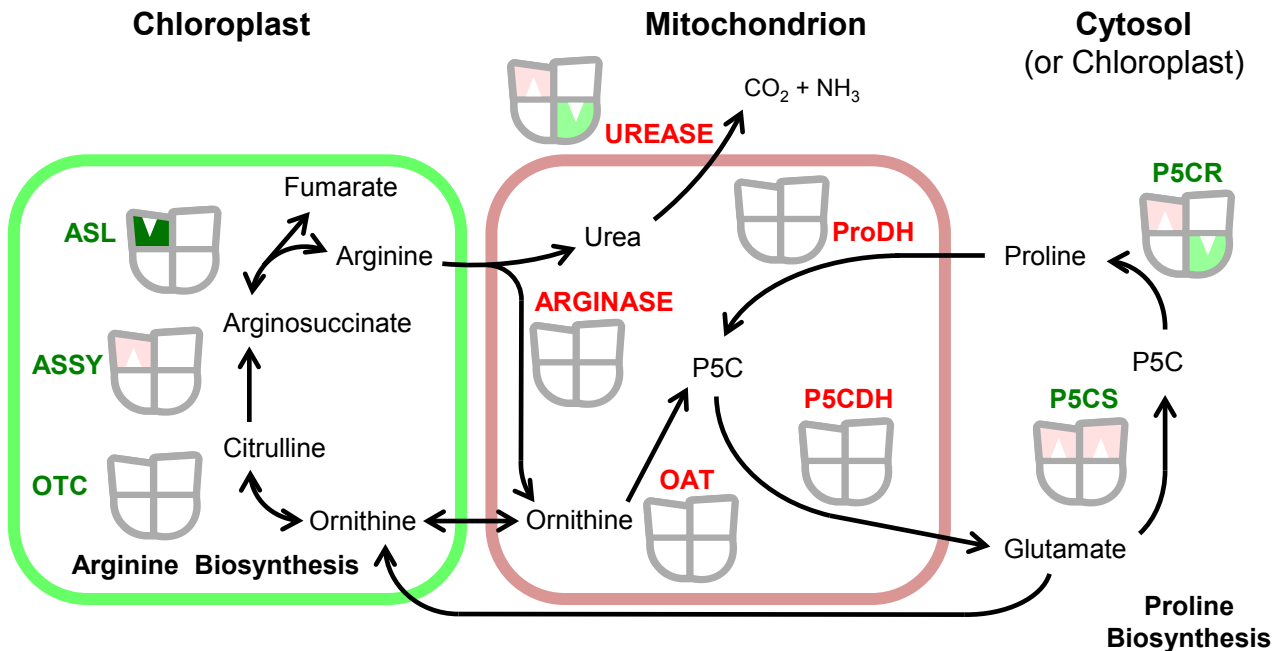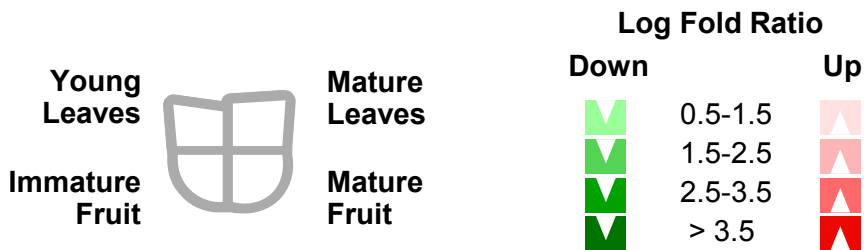

**Figure S8. HLB-modulation of arginine and proline pathways.**

Color values indicate transcript abundance, in symptomatic compared to apparently healthy samples, are indicated by the same convention as in Fig. 2.
