# Supplementary material for: Gene Regulatory Networks Elucidating Huanglongbing Disease Mechanisms
Source: PubMed Central journal article supplement (PMC3783430; doi:10.1371/journal.pone.0074256), 2013-09-25
Supplement: pone.0074256.s009.pdf [file pone.0074256.s009.pdf]

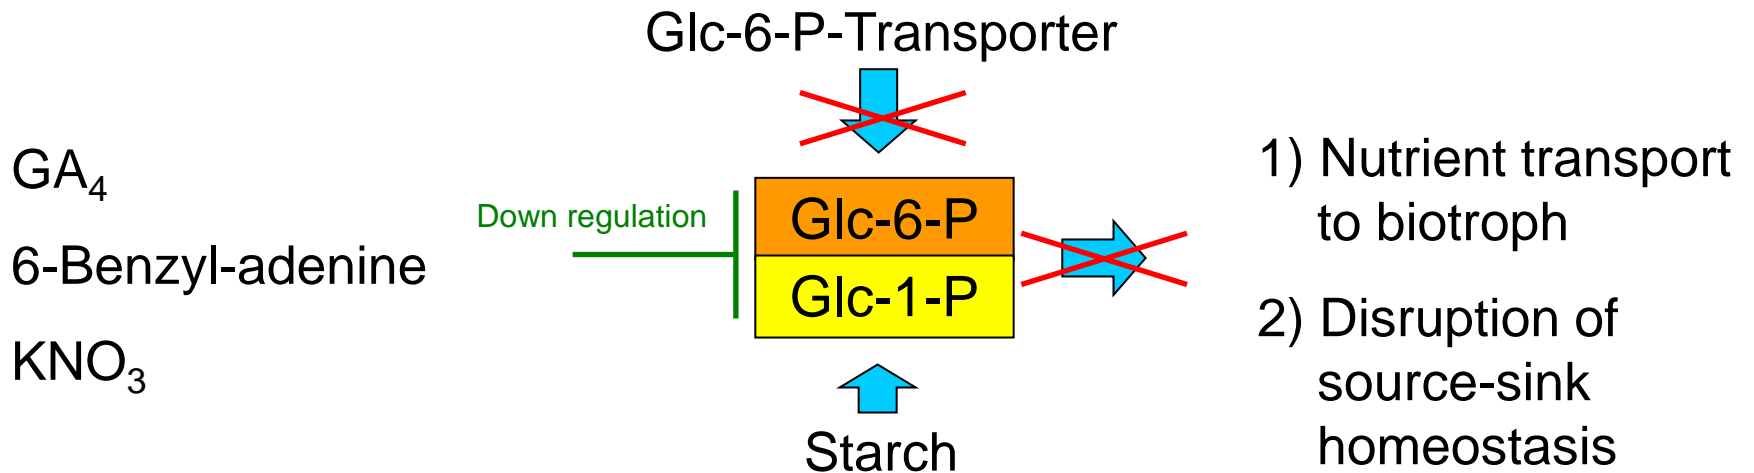

Data from Genevestigator database (<https://www.genevestigator.com/gv/>):

KNO<sub>3</sub> — KAT-00417 / [ArrayExpress-annotation](#)

GA<sub>4</sub> — AT-00409 / [GEO-annotation](#)

6-Benzyl-adenine — AT-00156 / [GEO-annotation](#)

**Figure S9.** Proposed short-term therapeutic strategy to reverse source-sink dysfunction using regulators of glucose transporter
